# Supplementary material for: C. elegans CARMIL negatively regulates UNC-73/Trio function during neuronal development
Source: Oxford University Press journal article supplement (doi:10.1242/dev.026666), 2009-02-26
Supplement: dev026666-sup-026666-figs1.pdf [file dev026666-sup-026666-figs1.pdf]

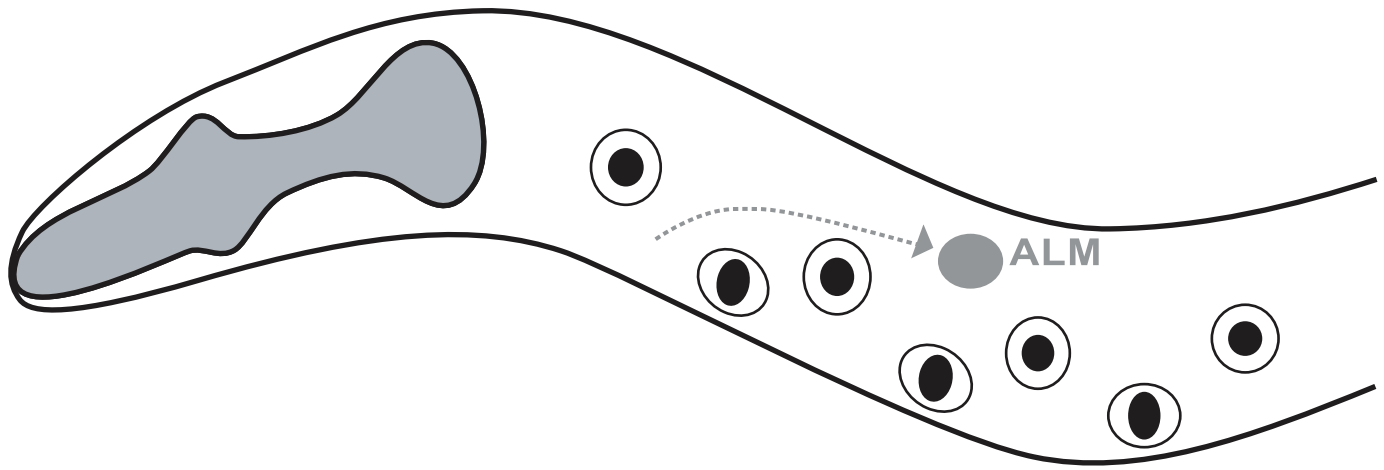

|                                            | V1 | P1/2 | V2 | P3/4 | V3 | P5/6 | V4 | n   |
|--------------------------------------------|----|------|----|------|----|------|----|-----|
| wild type                                  |    | 1    | 23 | 76   |    |      |    | 101 |
| <i>unc-34(gm114)</i>                       | 6  | 27   | 32 | 34   |    |      |    | 62  |
| <i>crml-1(gm326); unc-34(gm114)</i>        |    | 3    | 18 | 79   |    |      |    | 78  |
| <i>crml-1(gm331); unc-34(gm114)</i>        |    | 4    | 13 | 82   |    |      |    | 45  |
| <i>crml-1(n1962); unc-34(gm114)</i>        |    |      | 12 | 88   |    |      |    | 50  |
| <i>crml-1(gm326)</i>                       |    | 2    | 2  | 26   | 69 | 2    |    | 62  |
| <i>unc-73(e936)</i>                        | 1  | 7    | 25 | 36   | 31 |      |    | 95  |
| <i>unc-73(rh40)</i>                        |    | 5    | 15 | 36   | 34 |      |    | 86  |
| <i>unc-73(e936) crml-1(gm326)</i>          | 2  | 6    | 19 | 32   | 40 |      |    | 62  |
| <i>unc-73(rh40) crml-1(gm326)</i>          | 2  | 2    | 21 | 39   | 34 | 2    |    | 56  |
| <i>gmls14 [Pmec-7::vab-8L::gfp]*</i>       |    |      |    |      | 51 | 45   | 4  | 82  |
| <i>crml-1(gm326); gmls14*</i>              |    |      |    |      | 12 | 70   | 18 | 60  |
| <i>unc-73(rh40); gmls14*</i>               | 5  | 16   | 31 | 42   | 5  | 2    |    | 62  |
| <i>unc-73(rh40) crml-1(gm326); gmls14*</i> | 3  | 3    | 25 | 48   | 23 |      |    | 40  |
