# Supplementary material for: C. elegans CARMIL negatively regulates UNC-73/Trio function during neuronal development
Source: Oxford University Press journal article supplement (doi:10.1242/dev.026666), 2009-02-26
Supplement: dev026666-sup-026666-figs2.pdf [file dev026666-sup-026666-figs2.pdf]

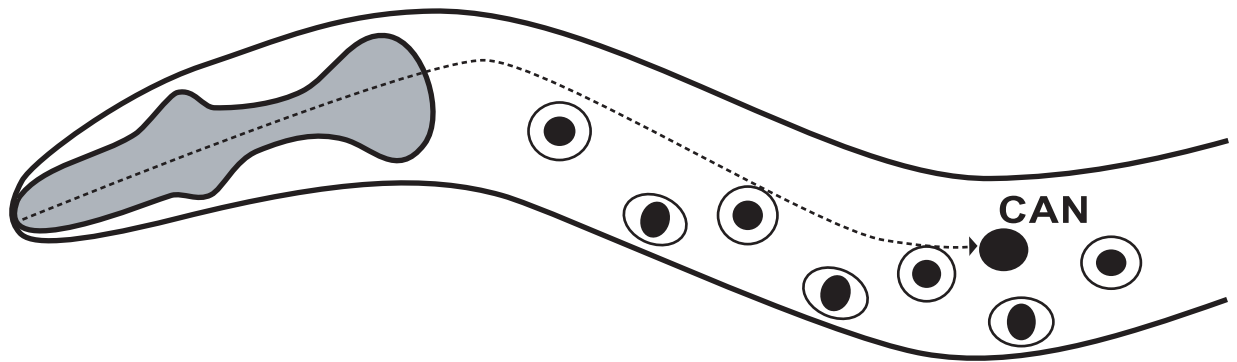

|                                               | V1 |    | P1/2 |    | V2 |    | P3/4 |  | V3 |  | P5/6 |    | V4 | n   |
|-----------------------------------------------|----|----|------|----|----|----|------|--|----|--|------|----|----|-----|
| wild type                                     |    |    |      |    |    |    |      |  |    |  | 75   | 25 |    | 100 |
| <i>unc-34(gm114)</i>                          | 15 | 9  | 15   | 13 | 21 | 22 | 5    |  |    |  |      |    |    | 86  |
| <i>crml-1(gm326)/+; unc-34</i>                | 2  | 2  | 7    | 13 | 35 | 39 | 2    |  |    |  |      |    |    | 54  |
| <i>crml-1(gm326); unc-34</i>                  |    | 1  | 4    | 5  | 21 | 64 | 5    |  |    |  |      |    |    | 97  |
| <i>crml-1(gm331)/+; unc-34</i>                | 3  | 4  | 8    | 15 | 26 | 38 | 5    |  |    |  |      |    |    | 73  |
| <i>crml-1(gm331); unc-34</i>                  |    |    |      |    | 31 | 60 | 9    |  |    |  |      |    |    | 45  |
| <i>crml-1(n1962)/+; unc-34</i>                | 3  |    | 12   | 12 | 32 | 41 |      |  |    |  |      |    |    | 34  |
| <i>crml-1(n1962); unc-34</i>                  |    |    | 2    |    | 16 | 70 | 12   |  |    |  |      |    |    | 50  |
| <i>crml-1(gm326); unc-34(gm104)</i>           |    |    | 6    | 6  | 23 | 49 | 15   |  |    |  |      |    |    | 47  |
| <i>unc-34(gm114)</i> fed L4440 dsRNA#         | 6  | 4  | 19   | 13 | 35 | 16 | 7    |  |    |  |      |    |    | 96  |
| <i>unc-34(gm114)</i> fed <i>crml-1</i> dsRNA# |    | 1  | 4    | 4  | 30 | 51 | 10   |  |    |  |      |    |    | 107 |
| <i>unc-73(e936)</i>                           | 13 | 8  | 6    | 6  | 10 | 38 | 19   |  |    |  |      |    |    | 52  |
| <i>unc-73(rh40)</i>                           | 4  | 2  | 13   | 12 | 10 | 48 | 12   |  |    |  |      |    |    | 68  |
| <i>unc-73(e936) crml-1(gm326)</i>             | 12 | 8  | 3    | 5  | 13 | 35 | 23   |  |    |  |      |    |    | 60  |
| <i>unc-73(rh40) crml-1(gm326)</i>             | 4  | 6  | 10   | 10 | 9  | 44 | 17   |  |    |  |      |    |    | 70  |
| <i>crml-1(gm326)</i>                          |    |    |      |    |    | 71 | 29   |  |    |  |      |    |    | 62  |
| <i>gmEx374 [Pcrml-1::crml-1::gfp] (CAN-)</i>  |    |    |      |    | 2  | 72 | 26   |  |    |  |      |    |    | 43  |
| <i>gmEx374 [Pcrml-1::crml-1::gfp] (CAN+)</i>  | 11 | 20 | 11   | 6  | 30 | 17 | 6    |  |    |  |      |    |    | 71  |
| <i>gmEx505 [Pcrml-1::gfp]</i>                 |    |    |      |    |    | 50 | 50   |  |    |  |      |    |    | 34  |
| <i>gmls32 [Pcrml-1::crml-1::gfp]</i>          | 1  | 3  | 12   | 11 | 19 | 48 | 5    |  |    |  |      |    |    | 91  |
| <i>crml-1(gm326); gmls32</i>                  |    |    | 2    |    | 8  | 78 | 12   |  |    |  |      |    |    | 50  |
